# Supplementary material
Source: PubMed Central journal article supplement (PMC4707453)
Supplement: supp_tpc.15.00463_TPC2015-00463-RAR2_Supplemental_Data.pdf [file supp_tpc.15.00463_TPC2015-00463-RAR2_Supplemental_Data.pdf]

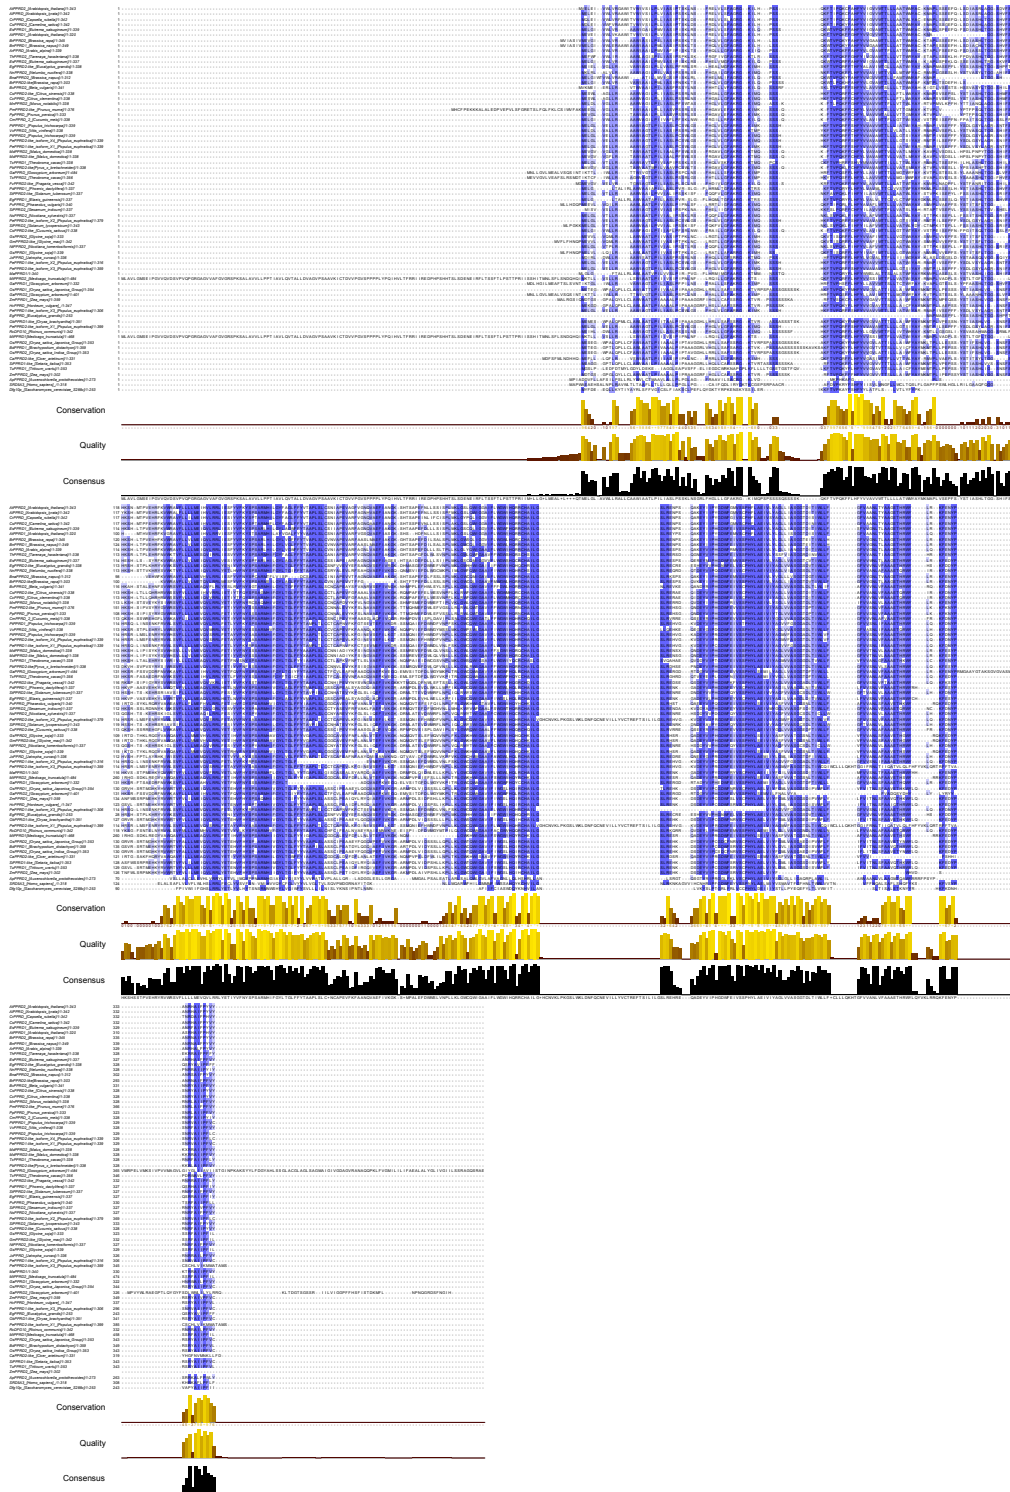

**Supplemental Figure 1.** Alignment of Amino Acid Sequences of Proteins with Steroid 5 $\alpha$ -Reductase Domain from Human (hSRD5A3), Yeast *Saccharomyces cerevisiae* (Dfg10p) and 60 Plant Species. Highly conserved amino acids are highlighted. The alignment was made using the ClustalW program. Related to Figure 1.

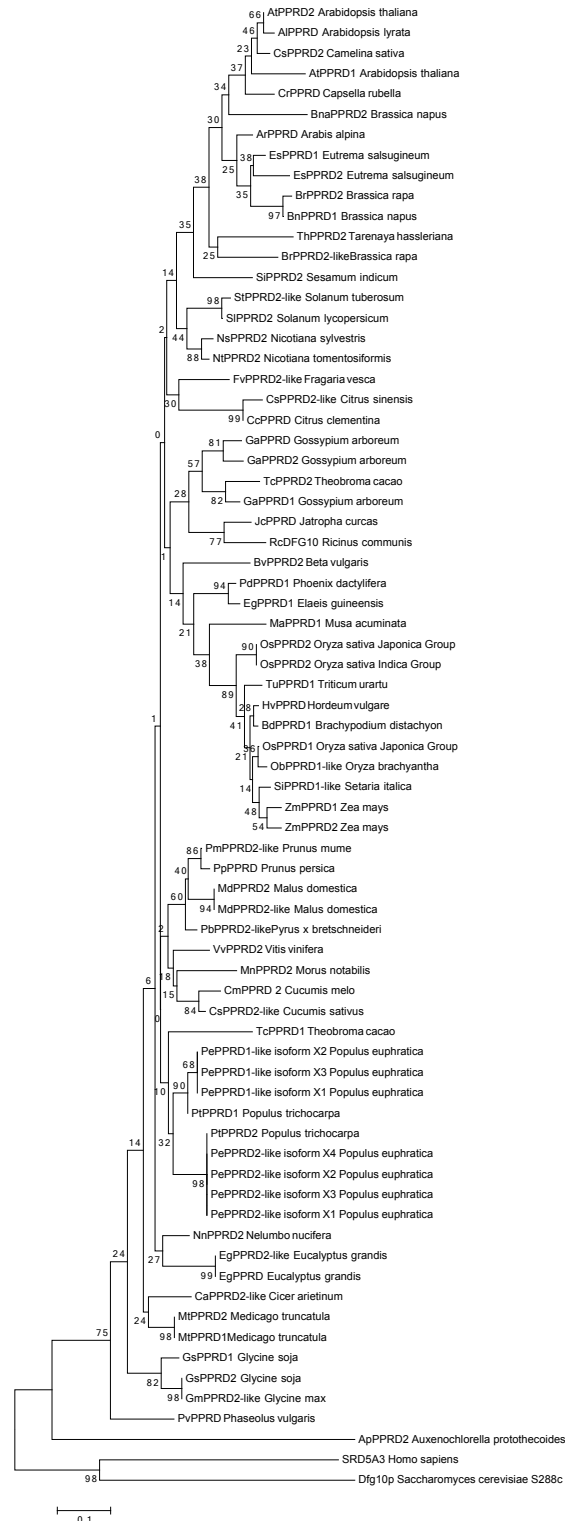

**Supplemental Figure 2.** Evolutionary Tree of Proteins with Steroid 5 $\alpha$ -Reductase Domain. Amino acid sequences of proteins from 60 plant species, yeast (Dfg10p) and human (hSRD5A3) were aligned as above and the tree was constructed using the neighbor-joining method. Related to Supplemental Figure 1.

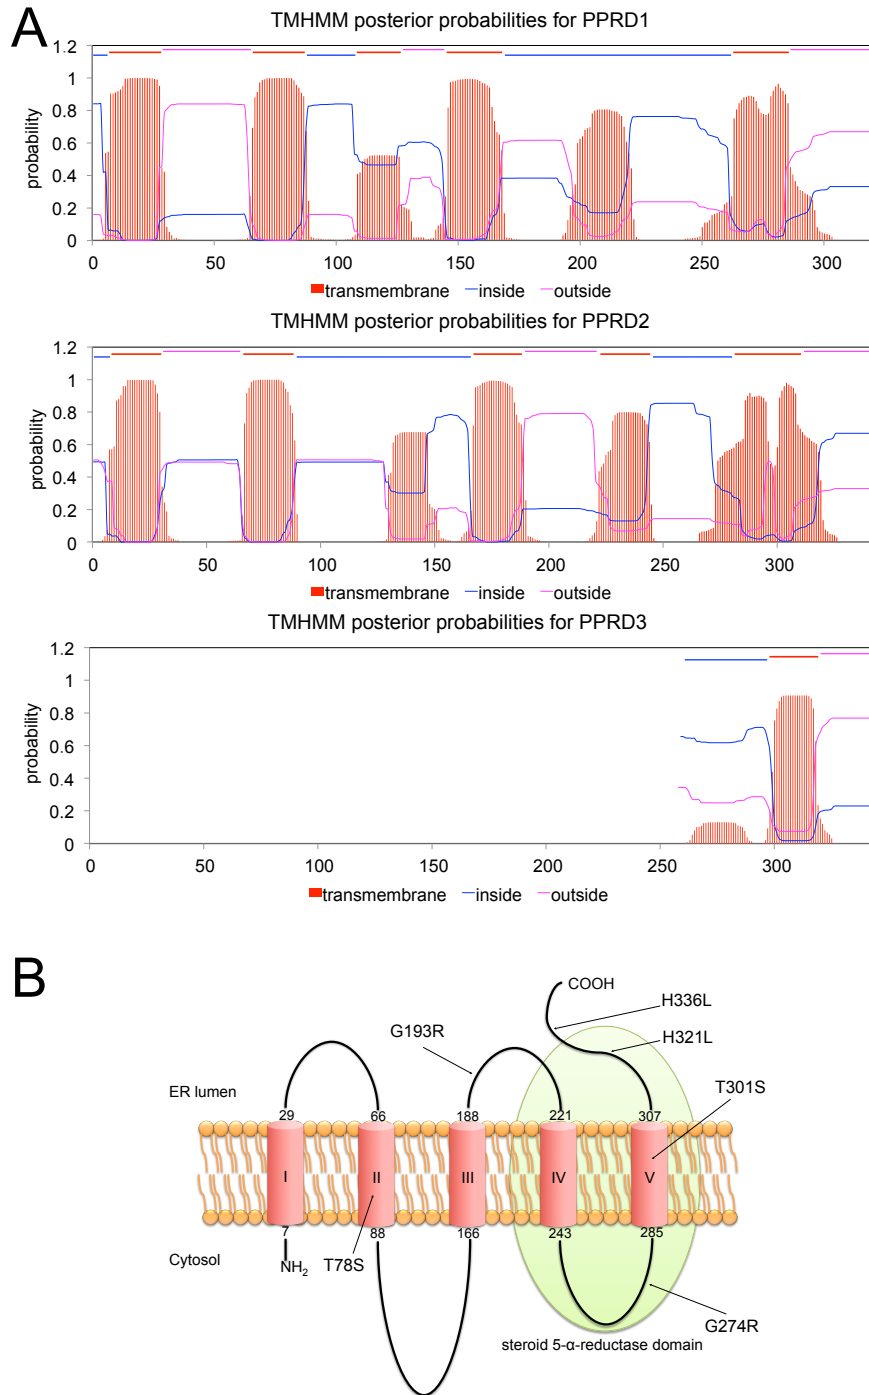

**Supplemental Figure 3. Models of PPRDs, Related to Supplemental Figure 1.**

(A) Predicted transmembrane domains in PPRD1, PPRD2 and PPRD3. Please note that numbering of X-axis used for PPRD3 does not align to the amino acid numbers in this protein. (B) Topology model of PPRD2; five predicted transmembrane domains (in red) and putative steroid reductase domain (in green) are indicated. Amino acid residues of particular interest are indicated, namely H321 and H336 subjected to site-directional mutagenesis (this report) and natural polymorphisms observed for PPRD2 isolated from *Arabidopsis thaliana* hairy roots (T78S, G193R, G274R and T301S).

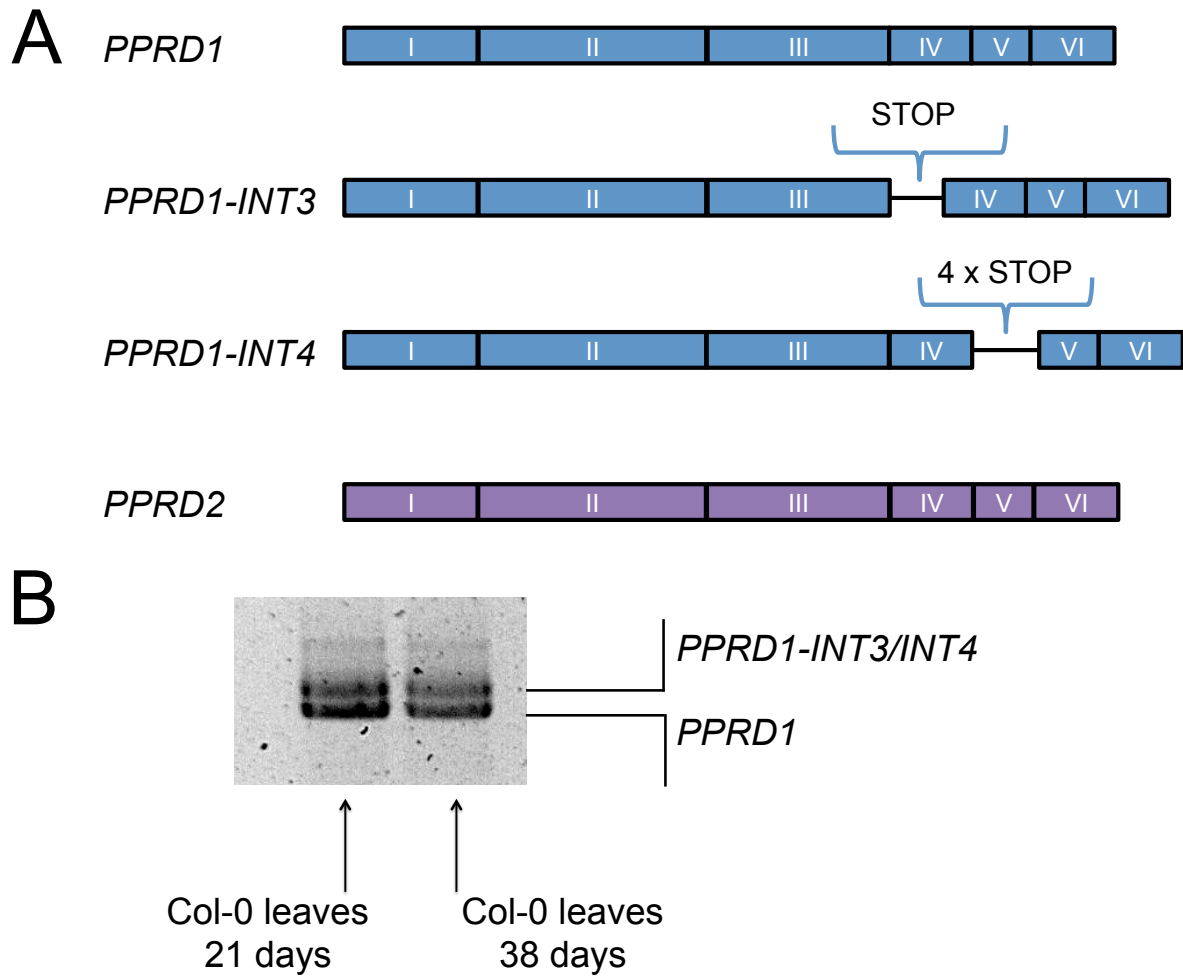

**Supplemental Figure 4.** Schematic Representation and Expression of PPRDs, Related to Figure 2.

(A) Structure of coding sequences of *PPRD1*, *PPRD1-INT3*, *PPRD1-INT4* and *PPRD2*. Premature STOP codons are present in *PPRD1-INT3* and *PPRD1-INT4*. The two latter DNA fragments were obtained during cloning of *PPRD1* cDNA.

(B) *PPRD1* transcripts detected by (RT-PCR) in the leaves of 21- and 38-day-old WT plants. Bands corresponding to *PPRD1* and *PPRD1-INT3/PPRD1-INT4* are indicated.

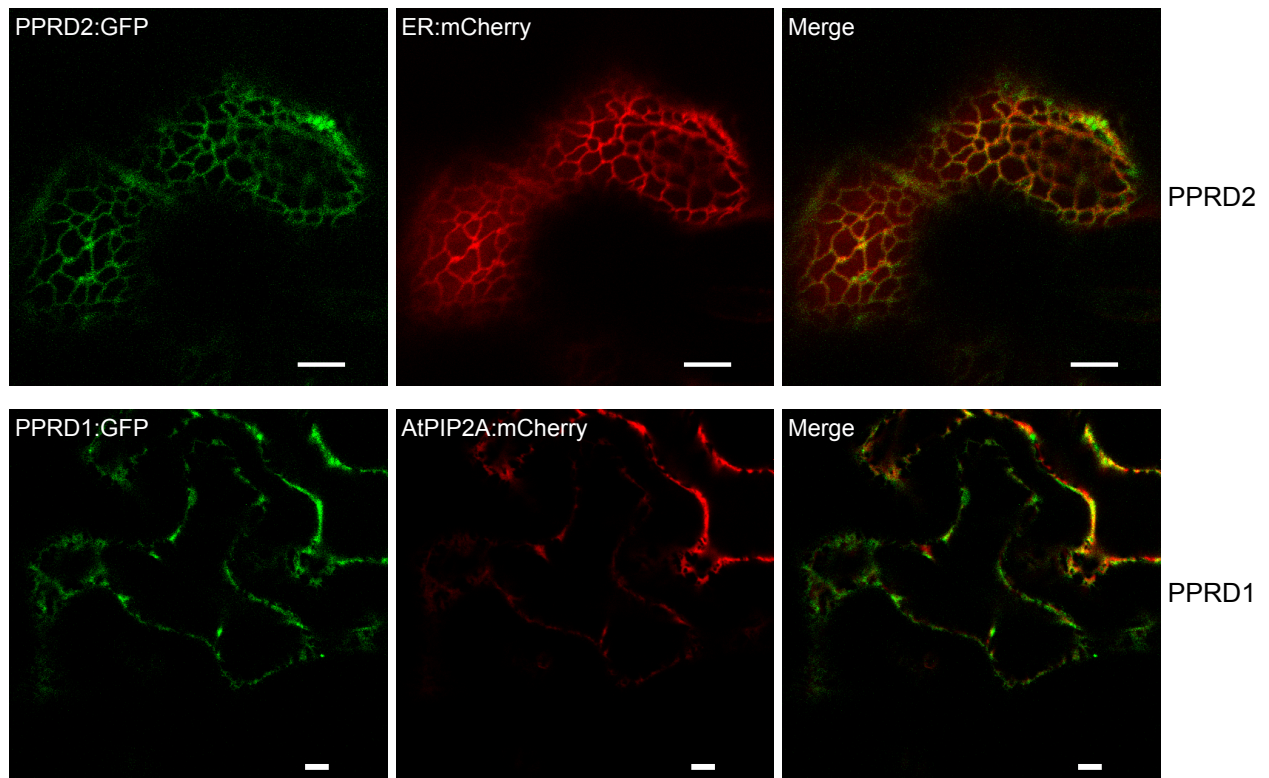

**Supplemental Figure 5. Subcellular Localization of PPRD1 and PPRD2. Related to Figure 2.** Co-localization of GFP-tagged PPRD2 or PPRD1 (green) with organelle markers – ER:mCherry and AtPIP2A:mCherry (red). Scale bar = 10  $\mu$ m.

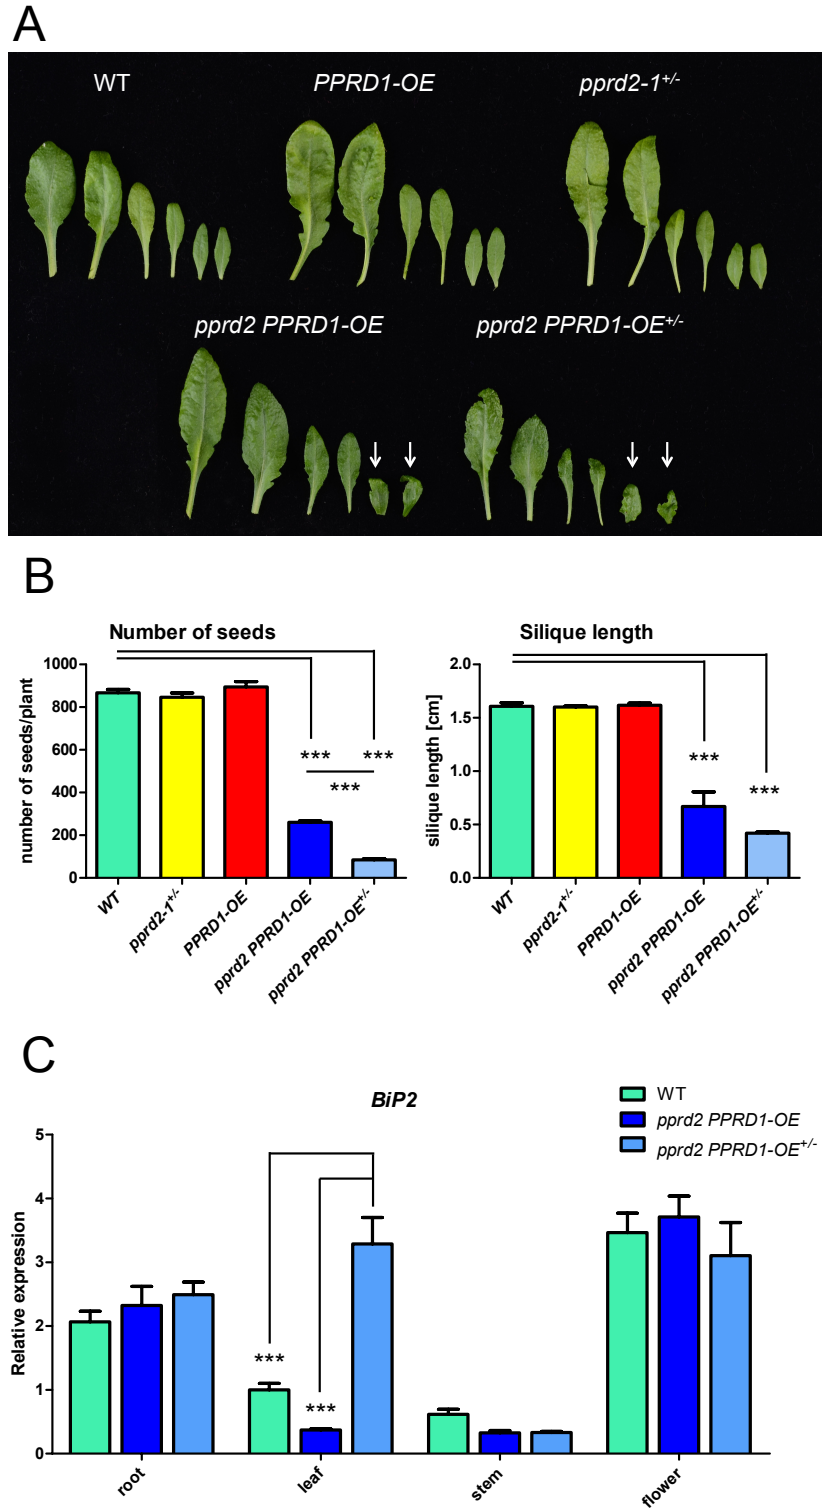

**Supplemental Figure 6.** Phenotypes of WT, *pprd2-1<sup>+/-</sup>*, *PPRD1-OE*, *pprd2 PPRD1-OE* and *pprd2 PPRD1-OE<sup>+/-</sup>* Plants. Related to Figure 4. (A) Leaves, (B) seed number and silique length and (C) expression of *BiP2* in WT and studied mutants. White arrows indicate undulated leaves. Statistically significant differences from WT are indicated; \*\*\* -  $P < 0.001$ .

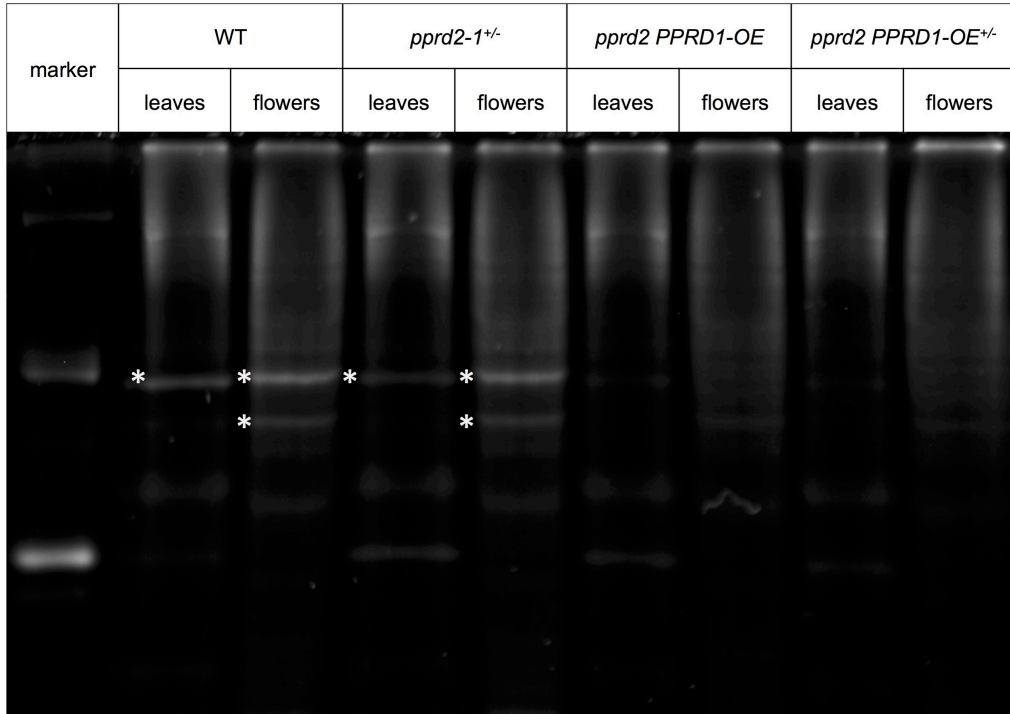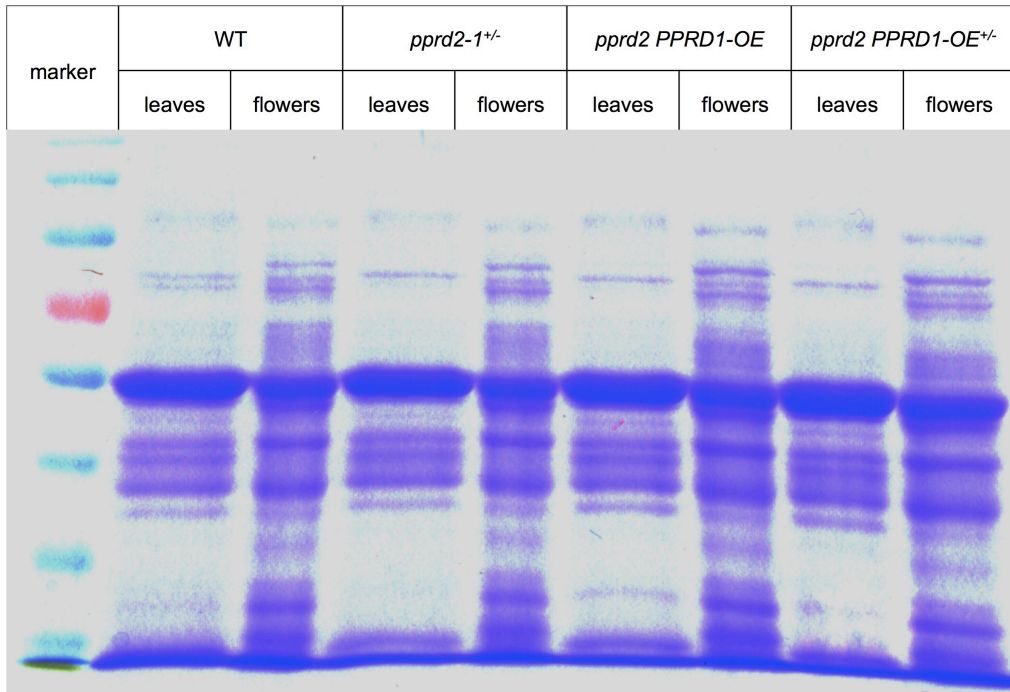

**Supplemental Figure 7. Analysis of Glycosylated Proteins in WT, *pprd2-1<sup>+/-</sup>*, *pprd2 PPRD1-OE* and *pprd2 PPRD1-OE<sup>+/-</sup>* Plants.** Protein extracts from leaves and flowers were separated by SDS-PAGE and gel was stained with Glycoprotein Gel Stain (upper image) or Coomassie Brilliant Blue (lower image). Marker lines contain, respectively, Glycoprotein Molecular Weight Standard or PageRuler™ Prestained Protein Marker. Asterisks mark bands present in WT extracts but absent in *pprd2* lines.

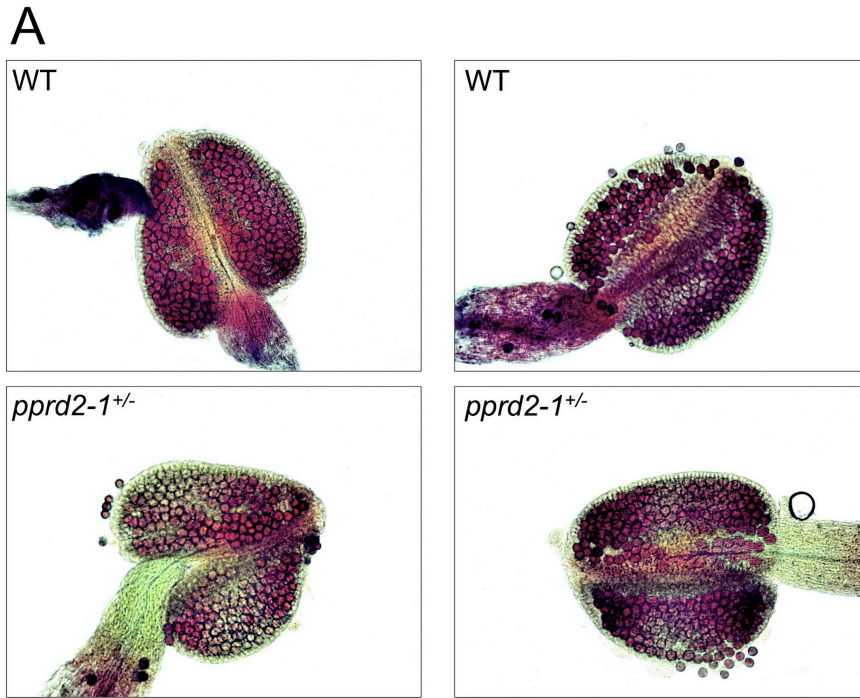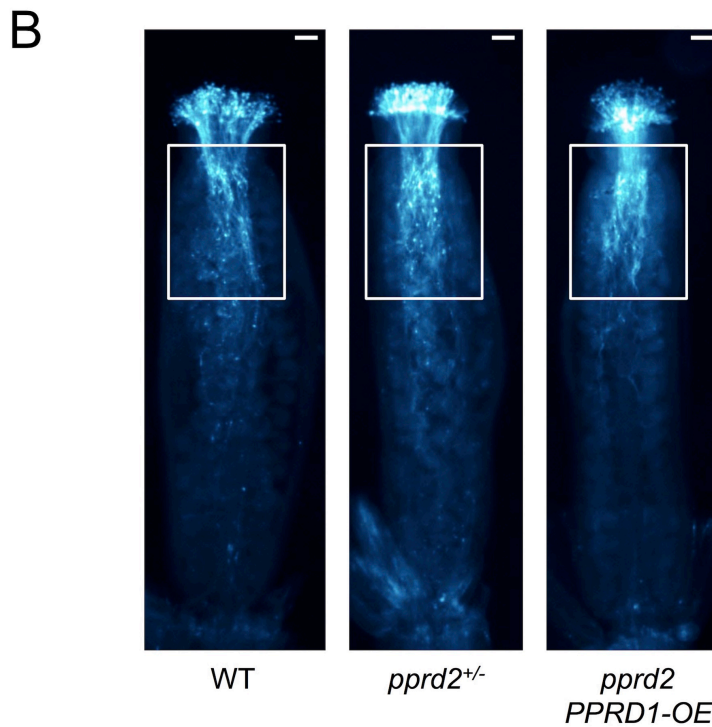

**Supplemental Figure 8. (A) Alexander Staining of Mature Anthers of WT and *pprd2-1<sup>+/-</sup>* Plants and (B) Aniline Blue Staining of Pollen Tube in the Pistil.**

For the latter analysis pollen grains from wild-type, *pprd2<sup>+/-</sup>* or *pprd2* PPRD1-OE mutants were used to pollinate wild-type stigma. Pollen tubes were visualized by aniline blue staining. White frame indicates region of highest accumulation of inhibited pollen tubes of mutant origin. Scale bar = 100  $\mu$ m.

Related to Figure 5 and 6.



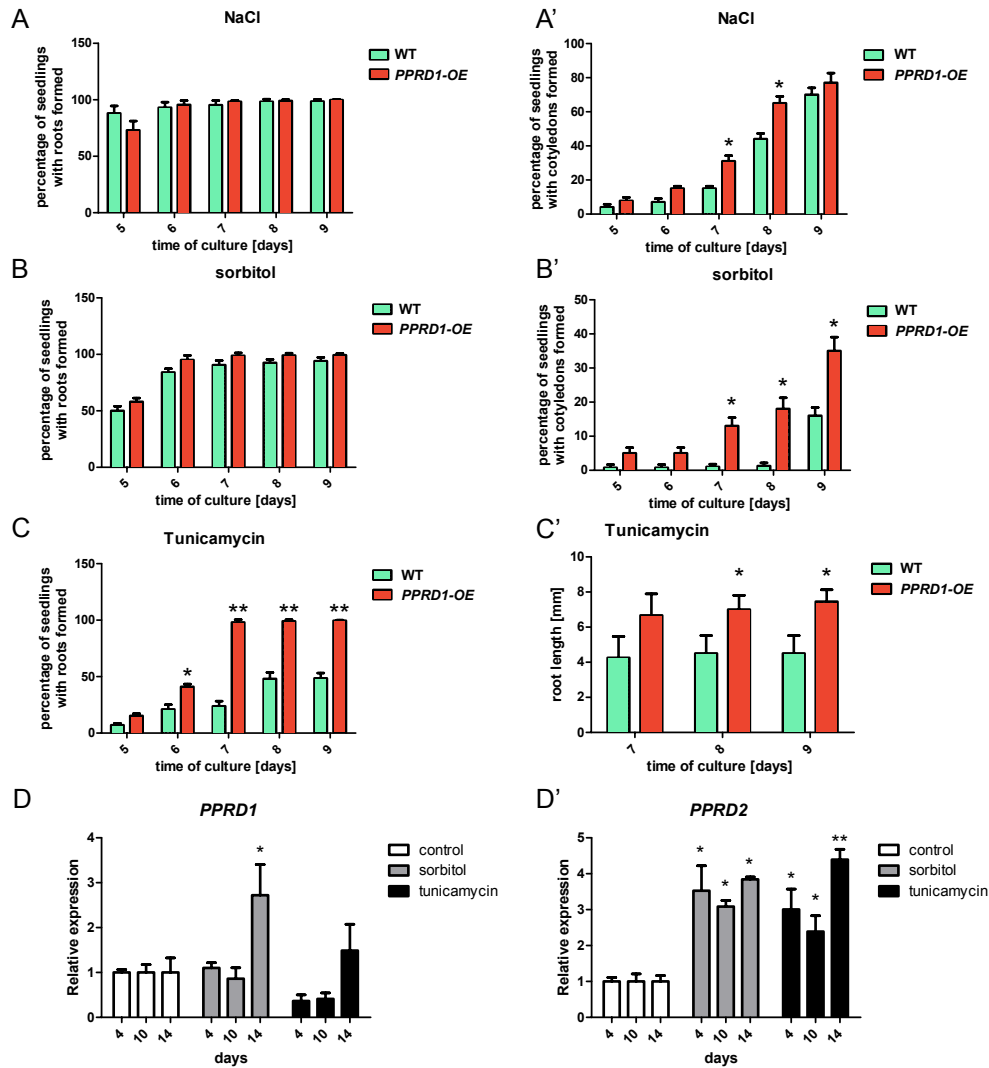

**Supplemental Figure 9. Effect of *PPRD1* Overexpression on Plant Tolerance to Stress.**

Effect of sodium chloride and sorbitol (A, B) and tunicamycin (C) on WT and *PPRD1-OE* seed germination. Percentage of seedlings with roots formed (A, B, C); cotyledons (A', B') and root growth (C'). Fifty seeds of each genotype were germinated per experiment; values are means  $\pm$  SD of three independent experiments. (D) Expression of *PPRD1* (D) and *PPRD2* (D') in *Arabidopsis* seedlings treated with sorbitol or tunicamycin normalized to control conditions. Bars represent mean value  $\pm$ SD of four independent experiments. Statistically significant differences are indicated; \* -  $P < 0.05$  and \*\* -  $P < 0.01$ .

Since dolichol is postulated to participate in cell response to environmental stress *PPRD1-OE* plants (Figure 3B) containing higher Dol level (Figure 3E) were challenged with various stimuli. Therefore the plant germination test was performed in the presence of sorbitol or NaCl.

Overexpression of *PPRD1* improved the formation of cotyledons upon NaCl and especially sorbitol treatments, while it did not affect the appearance of roots comparing to WT plants (Panels A/A' and Panels B/B').

Additionally, effect of tunicamycin, an inhibitor of protein glycosylation on seed germination was tested too. Overexpression of *PPRD1* enabled development of roots for all the seedlings in contrast to WT plants (only 50% of germinating seeds). Moreover the roots of the *PPRD1-OE* seedling were substantially longer than WT (Panels C/C'). Thus, overexpression of *PPRD1* increases plant tolerance to sorbitol and salinity and prevents tunicamycin toxicity.

To study further the relations between the PPRDs and stress we determined their expression profiles in WT plants treated with sorbitol and tunicamycin (Panels D/D'). *PPRD2* expression was induced 3-4-fold after four days of treatment with either compound and increased slightly with time. In contrast, the *PPRD1* expression was induced 3-fold by sorbitol after fourteen days and somewhat inhibited by tunicamycin during ten days of treatment.

Taken together, *PPRD2* undergoes induction in response to various adverse environmental factors.

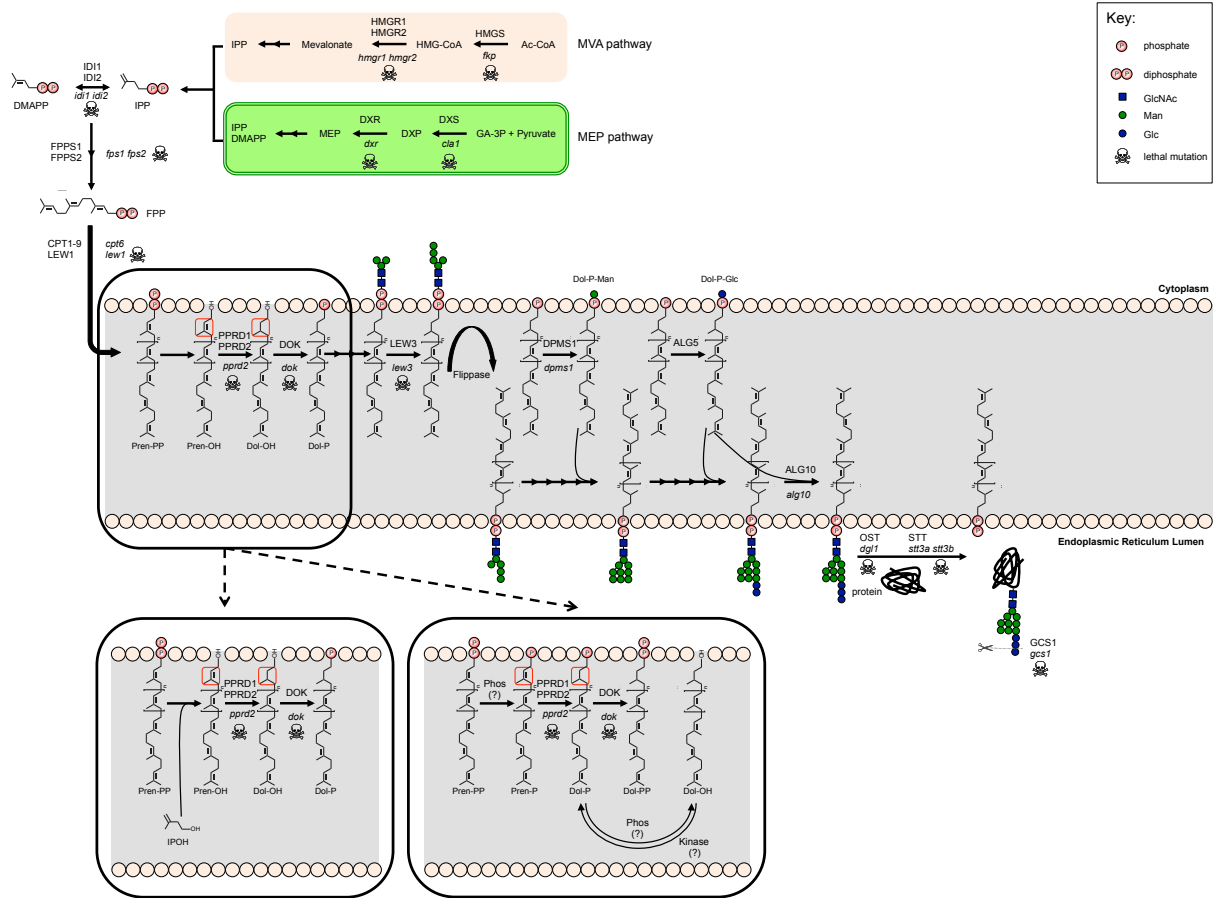

**Supplemental Figure 10. Dolichol Cycle in Plant Cells, Related to Discussion.**

Genes crucial for the pathway are indicated, lethal phenotypes are marked. Two insets present alternative, yet not documented steps of Prenol to Dolichol conversion. Abbreviations used: MVA - mevalonate, Ac-CoA - acetyl-CoA, GA-3P - D-glyceraldehyde-3-phosphate, HMG-S - 3-hydroxy-3-methylglutaryl-CoA synthase, HMG-CoA - 3-hydroxy-3-methylglutaryl-coenzyme A, HMGGR - 3-hydroxy-3-methylglutaryl-CoA reductase, IPP - isopentenyl diphosphate, DMAPP - dimethylallyl diphosphate, DXS - 1-deoxy-D-xylulose-5-phosphate synthase, DXR - 1-deoxy-D-xylulose 5-phosphate reductoisomerase, DXP - 1-deoxy-D-xylulose 5-phosphate, MEP - 2-C-methylerythritol 4-phosphate, IDI - isopentenyl diphosphate isomerase, FPPS - farnesyl diphosphate synthase, CPT - *cis*-prenyltransferase, PPRD – polyprenol reductase, DOK – dolichol kinase, LEW - leaf wilting, DPMS - DolPMan synthase, ALG5 - putative dolichyl-phosphate beta-glucosyltransferase, ALG10 - alpha-1,2-glucosyltransferase, OST - dolichyl-diphosphooligosaccharide-protein glycosyltransferase, STT - dolichyl-diphosphooligosaccharide-protein glycosyltransferase, GCS - alpha-glucosidase 2, Phos – phosphatase.

**Supplemental Table 1.** Comparison of Amino Acid Sequences of Putative PPRDs with Human and Yeast Polyprenol Reductases Based on the Alignment, Related to Supplemental Figure 1.

| Protein | Gene locus | Comparison to hSRD5A3 |                |                | Comparison to Dfg10p |                |                |
|---------|------------|-----------------------|----------------|----------------|----------------------|----------------|----------------|
|         |            | Identity [%]          | Similarity [%] | BLASTP E-value | Identity [%]         | Similarity [%] | BLASTP E-value |
| PPRD1   | At1G72590  | 29                    | 50             | 8E-36          | 26                   | 39             | 2E-15          |
| PPRD2   | At2G16530  | 28                    | 47             | 3E-38          | 27                   | 42             | 2E-13          |
| PPRD3   | At3G43840  | 30                    | 54             | 0.031          | 27                   | 47             | 1E-04          |

**Supplemental Table 2.** Localisation of Predicted 3-oxo-5- $\alpha$ -steroid 4-dehydrogenase Domain in Arabidopsis Polyprenol Reductases. Related to Supplemental Figure 3.

| Protein | Protein length [a.a.] | Predicted 3-oxo-5- $\alpha$ -steroid 4-dehydrogenase domain [a.a.] | E-value |
|---------|-----------------------|--------------------------------------------------------------------|---------|
| PPRD1   | 320                   | 199-320                                                            | 7.2E-24 |
| PPRD2   | 343                   | 223-343                                                            | 1.1E-22 |
| PPRD3   | 84                    | 14-84                                                              | 6.7E-10 |

**Supplemental Table 3.** Seed Germination of *pprd2-1<sup>+/-</sup>* and *pprd2-2<sup>+/-</sup>* Plants on Solid Medium, Related to Figure 4.

| Seeds      | <i>pprd2-1<sup>+/-</sup></i> | <i>pprd2-2<sup>+/-</sup></i> | WT         |
|------------|------------------------------|------------------------------|------------|
| Sown       | 203 (100%)                   | 210 (100%)                   | 200 (100%) |
| Germinated | 197 (97%)                    | 206 (98%)                    | 198 (99%)  |

**Supplemental Table 4.** Mass Spectrometry-based Differential Proteomics of WT and *pprd2 PPRD1-OE<sup>+/-</sup>* Plants. Proteins extracted from the flowers of 10-week-old plants were subjected to MS analysis. Listed are the proteins present in WT but totally absent from *pprd2 PPRD1-OE<sup>+/-</sup>*. Predicted number of *N*-glycosylation sites, function (described / predicted) and site of expression of particular proteins according to NetNGlyc 1.0 Server and TAIR database, respectively.

| No. | Protein                                         | Predicted glycosylation sites | Gene locus | Function                                                                                                                                                                                       | Expressed in<br>(organs with highest expression are in bold)                                                                                                                                                                                                                                                                                        |
|-----|-------------------------------------------------|-------------------------------|------------|------------------------------------------------------------------------------------------------------------------------------------------------------------------------------------------------|-----------------------------------------------------------------------------------------------------------------------------------------------------------------------------------------------------------------------------------------------------------------------------------------------------------------------------------------------------|
| 1   | ASN2,<br>ASPARAGINE<br>SYNTHETASE<br>2          | 2                             | AT5G65010  | L-asparagine biosynthetic process, ammonium ion metabolic process, asparagine biosynthetic process, cysteine biosynthetic process, glutamine metabolic process, hyperosmotic salinity response | carpel, cauline leaf, collective leaf structure, <b>cotyledon</b> , flower, guard cell, <b>hypocotyl</b> , inflorescence meristem, leaf apex, leaf lamina base, pedicel, petal, petiole, plant embryo, plant sperm cell, pollen tube cell, root, seed, sepal, shoot apex, shoot system, stamen, stem, <b>vascular leaf</b>                          |
| 2   | GLYCOSYL<br>HYDROLASE<br>FAMILY<br>PROTEIN      | 4                             | AT5G20950  | carbohydrate metabolic process, glucan catabolic process, response to endoplasmic reticulum stress, systemic acquired resistance                                                               | adult vascular leaf, <b>carpel</b> , cauline leaf, collective leaf structure, cotyledon, flower, fruit, guard cell, hypocotyl, <b>inflorescence meristem</b> , juvenile vascular leaf, leaf apex, leaf lamina base, pedicel, petal, petiole, plant embryo, pollen, root, seed, sepal, <b>shoot apex</b> , shoot system, stamen, stem, vascular leaf |
| 3   | ABNORMAL<br>INFLORESCEN<br>CE MERISTEM,<br>AIM1 | 3                             | AT4G29010  | fatty acid beta-oxidation, flower development, jasmonic acid biosynthetic process, multicellular organismal development, seed germination                                                      | carpel, cauline leaf, collective leaf structure, cotyledon, <b>flower</b> , fruit, guard cell, hypocotyl, inflorescence meristem, leaf apex, leaf lamina base, pedicel, <b>petal</b> , petiole, plant embryo, pollen, root, <b>seed</b> , sepal, shoot apex, shoot system, <b>stamen</b> , stem, vascular leaf                                      |
| 4   | PECTIN<br>LYASE-LIKE<br>SUPERFAMILY<br>PROTEIN  | 7                             | AT4G23500  | carbohydrate metabolic process, cell wall organization                                                                                                                                         | guard cell, <b>inflorescence meristem</b>                                                                                                                                                                                                                                                                                                           |
| 5   | SKS11, SKU5<br>SIMILAR 11                       | 6                             | AT3G13390  | oxidation-reduction process                                                                                                                                                                    | carpel, collective leaf structure, flower, pedicel, petal, plant embryo, pollen, <b>pollen</b> tube cell, sepal, <b>stamen</b> , stem                                                                                                                                                                                                               |
| 6   | A. THALIANA                                     | 1                             | AT3G10160  | one-carbon metabolic process,                                                                                                                                                                  | carpel, cauline leaf, collective leaf structure,                                                                                                                                                                                                                                                                                                    |

|    |                                                              |   |           |                                                                                                                                                                                                                  |                                                                                                                                                                                                                                                                                                                                                                                                         |
|----|--------------------------------------------------------------|---|-----------|------------------------------------------------------------------------------------------------------------------------------------------------------------------------------------------------------------------|---------------------------------------------------------------------------------------------------------------------------------------------------------------------------------------------------------------------------------------------------------------------------------------------------------------------------------------------------------------------------------------------------------|
|    | DHFS-FPGS<br>HOMOLOG C,<br>DFC                               |   |           | photorespiration, seedling<br>development,<br>tetrahydrofolylpolyglutamate<br>biosynthetic process                                                                                                               | cotyledon, <b>flower</b> , guard cell, hypocotyl,<br><b>inflorescence meristem</b> , leaf apex, leaf lamina<br>base, pedicel, petal, petiole, plant embryo,<br>pollen, root, <b>seed</b> , sepal, <b>shoot apex</b> , shoot<br>system, stamen, stem, <b>vascular leaf</b>                                                                                                                               |
| 7  | Transducin/WD<br>40 repeat-like<br>superfamily<br>protein    | 2 | AT2G20330 | N-terminal protein myristoylation,<br>biological_process, photoperiodism,<br>flowering, protein targeting to<br>mitochondrion                                                                                    | carpel, cauline leaf, collective leaf structure,<br>cotyledon, cultured plant cell, flower, guard cell,<br>hypocotyl, <b>inflorescence meristem</b> , leaf apex,<br>leaf lamina base, pedicel, petal, petiole, <b>plant<br/>embryo</b> , plant sperm cell, pollen, pollen tube<br>cell, root, <b>seed</b> , sepal, <b>shoot apex</b> , shoot<br>system, stamen, stem, vascular leaf                     |
| 8  | HOP1                                                         | 2 | AT1G12270 | cullin deneddylation, nucleotide<br>biosynthetic process,<br>photomorphogenesis                                                                                                                                  | <b>carpel</b> , cauline leaf, collective leaf structure,<br>cotyledon, cultured plant cell, <b>flower</b> , guard cell,<br>hypocotyl, <b>inflorescence meristem</b> , <b>leaf apex</b> ,<br>leaf lamina base, pedicel, <b>petal</b> , petiole, plant<br>embryo, pollen, <b>root</b> , <b>seed</b> , sepal, <b>shoot apex</b> ,<br>shoot system, stamen, stem, vascular leaf                             |
| 9  | O-Glycosyl<br>hydrolases<br>family 17 protein                | 8 | AT1G11820 | carbohydrate metabolic process,<br>defense response                                                                                                                                                              | guard cell, <b>inflorescence meristem</b>                                                                                                                                                                                                                                                                                                                                                               |
| 10 | HDA5,<br>HISTONE<br>DEACETYLASE<br>5                         | 1 | AT5G61060 | fatty acid beta-oxidation, histone<br>deacetylation, protein N-linked<br>glycosylation, protein import into<br>peroxisome matrix, regulation of<br>transcription, DNA-templated,<br>transcription, DNA-templated | <b>carpel</b> , <b>cauline leaf</b> , collective leaf structure,<br>cotyledon, <b>flower</b> , guard cell, hypocotyl,<br><b>inflorescence meristem</b> , leaf apex, leaf lamina<br>base, pedicel, <b>petal</b> , petiole, plant embryo,<br>pollen, root, seed, sepal, shoot apex, shoot<br>system, stamen, stem, vascular leaf                                                                          |
| 11 | PCK1, PEPCK,<br>PHOSPHOENO<br>LPYRUVATE<br>CARBOXYKINA<br>SE | 2 | AT4G37870 | cellular response to phosphate<br>starvation, defense response to<br>fungus, incompatible interaction,<br>gluconeogenesis, response to<br>cadmium ion                                                            | <b>carpel</b> , cauline leaf, collective leaf structure,<br>cotyledon, cultured plant cell, <b>flower</b> , guard cell,<br>hypocotyl, <b>inflorescence meristem</b> , leaf apex,<br>leaf lamina base, pedicel, <b>petal</b> , petiole, <b>plant<br/>embryo</b> , plant sperm cell, pollen, root, rosette<br>leaf, <b>seed</b> , sepal, shoot apex, shoot system,<br>stamen, <b>stem</b> , vascular leaf |
| 12 | 1-DEOXY-D-<br>XYLULOSE 5-                                    | 5 | AT4G15560 | 1-deoxy-D-xylulose 5-phosphate<br>biosynthetic process, aromatic amino                                                                                                                                           | <b>carpel</b> , <b>cauline leaf</b> , <b>cotyledon</b> , epidermis,<br>flower, fruit, guard cell, hypocotyl, <b>inflorescence</b>                                                                                                                                                                                                                                                                       |

|    |                                    |   |           |                                                                                                                                                                                                                                                                                                                                                                                                                                                                                                                                                                                                                                                                                                                                                                                                                                                                                                                                                                                                                                                                |                                                                                                                                                                                                                              |
|----|------------------------------------|---|-----------|----------------------------------------------------------------------------------------------------------------------------------------------------------------------------------------------------------------------------------------------------------------------------------------------------------------------------------------------------------------------------------------------------------------------------------------------------------------------------------------------------------------------------------------------------------------------------------------------------------------------------------------------------------------------------------------------------------------------------------------------------------------------------------------------------------------------------------------------------------------------------------------------------------------------------------------------------------------------------------------------------------------------------------------------------------------|------------------------------------------------------------------------------------------------------------------------------------------------------------------------------------------------------------------------------|
|    | PHOSPHATE SYNTHASE, CLA, DXS,      |   |           | acid family biosynthetic process, aromatic amino acid family metabolic process, carotenoid biosynthetic process, cell differentiation, cellular amino acid biosynthetic process, chlorophyll biosynthetic process, chlorophyll metabolic process, coenzyme biosynthetic process, cysteine biosynthetic process, glycine catabolic process, isopentenyl diphosphate biosynthetic process, methylerythritol 4-phosphate pathway, jasmonic acid biosynthetic process, leaf morphogenesis, lipoate metabolic process, nucleotide metabolic process, oxidoreduction coenzyme metabolic process, oxylipin biosynthetic process, phosphatidylglycerol biosynthetic process, positive regulation of transcription, DNA-templated, protein autophosphorylation, regulation of lipid metabolic process, regulation of protein localization, regulation of proton transport, response to light stimulus, secondary metabolic process, sulfur amino acid metabolic process, sulfur compound biosynthetic process, thiamine biosynthetic process, vitamin metabolic process | <b>meristem</b> , leaf apex, leaf lamina base, pedicel, <b>petal</b> , petiole, plant embryo, pollen, root, seed, sepal, <b>shoot apex</b> , shoot system, stamen, stem, stigma, trichome, <b>vascular leaf</b>              |
| 13 | PAL4, PHENYLALANINE AMMONIOLYASE 4 | 3 | AT3G10340 | L-phenylalanine catabolic process, cinnamic acid biosynthetic process, glucuronoxytan metabolic process, xylan biosynthetic process                                                                                                                                                                                                                                                                                                                                                                                                                                                                                                                                                                                                                                                                                                                                                                                                                                                                                                                            | carpel, collective leaf structure, <b>flower</b> , guard cell, hypocotyl, inflorescence meristem, <b>petal</b> , petiole, <b>plant embryo</b> , pollen, root, sepal, shoot apex, shoot system, <b>stamen</b> , vascular leaf |
| 14 | ABCF3                              | 2 | AT1G64550 | cytoskeleton organization, defense response to bacterium,                                                                                                                                                                                                                                                                                                                                                                                                                                                                                                                                                                                                                                                                                                                                                                                                                                                                                                                                                                                                      | <b>carpel</b> , cauline leaf, collective leaf structure, cotyledon, cultured plant cell, <b>flower</b> , guard cell,                                                                                                         |



|    |                     |   |           |                                                                                                                                                                                                                                                                                                                                                                                                                                                                                                          |                                                                                                                                                                                                                                                                                                                         |
|----|---------------------|---|-----------|----------------------------------------------------------------------------------------------------------------------------------------------------------------------------------------------------------------------------------------------------------------------------------------------------------------------------------------------------------------------------------------------------------------------------------------------------------------------------------------------------------|-------------------------------------------------------------------------------------------------------------------------------------------------------------------------------------------------------------------------------------------------------------------------------------------------------------------------|
|    |                     |   |           | gluconeogenesis, glycolytic process, mRNA export from nucleus, proteasomal protein catabolic process, protein import into nucleus, response to cadmium ion, response to salt stress                                                                                                                                                                                                                                                                                                                      | hypocotyl, <b>inflorescence meristem</b> , leaf apex, leaf lamina base, pedicel, petal, petiole, plant embryo, pollen, root, <b>seed</b> , sepal, <b>shoot apex</b> , shoot system, stamen, stem, vascular leaf                                                                                                         |
| 15 | GH3.17              | 1 | AT1G28130 | auxin homeostasis, brassinosteroid biosynthetic process, response to auxin                                                                                                                                                                                                                                                                                                                                                                                                                               | carpel, collective leaf structure, <b>flower</b> , hypocotyl, <b>petal</b> , plant embryo, pollen, root, seed, sepal, shoot apex, shoot system, <b>stamen</b> , stem, vascular leaf                                                                                                                                     |
| 16 | AN,<br>ANGUSTIFOLIA | 2 | AT1G01510 | actin nucleation, cell adhesion, chromatin silencing, floral organ morphogenesis, fruit morphogenesis, histone H3-K9 methylation, histone phosphorylation, inductive cell-cell signaling, leaf morphogenesis, microtubule cytoskeleton organization, monopolar cell growth, oxidation-reduction process, regulation of cell shape, regulation of epidermal cell differentiation, regulation of epidermal cell division, regulation of trichome morphogenesis, trichome branching, trichome morphogenesis | <b>carpel</b> , cauline leaf, collective leaf structure, cotyledon, <b>flower</b> , guard cell, hypocotyl, <b>inflorescence meristem</b> , leaf apex, leaf lamina base, pedicel, petal, petiole, <b>plant embryo</b> , pollen, <b>root</b> , seed, sepal, <b>shoot apex</b> , shoot system, stamen, stem, vascular leaf |

**Methodology:** Peptide mixtures were analyzed by liquid chromatography coupled to an LTQ FT ICR mass spectrometer (Hybrid-2D-Linear Quadrupole Ion Trap – Fourier Transform Ion Cyclotron Resonance Mass Spectrometer, Thermo Electron Corp., Bremen, Germany). Gel slices were subjected to a standard digestion procedure, during which proteins were reduced with 100 mM DTT for 30 min at 56°C, alkylated with iodoacetamide for 45 min in a darkroom at 22°C and digested overnight with Trypsin. The resulting peptides were eluted from the gel with 0.1% TFA and 2% ACN. The peptide mixture was applied to an RP-18 pre-column (LC Packings) using water that contained 0.1% TFA as the mobile phase and then transferred to a nano-HPLC RP-18 column (nanoACQUITY UPLC BEHC18, Waters) using an acetonitrile gradient (0–60% ACN in 30 min) in the presence of 0.05% formic acid with a flow rate of 150 nL/min. The column outlet was directly coupled to an ion source of LTQ-FT-MS that worked in the regime of data dependent MS to MS/MS switch. A blank run that ensured a lack of cross-contamination from previous samples preceded each analysis.

Acquired raw data were processed by Mascot Distiller (version 2.1.1, Matrix Science, London, UK) followed by Mascot Search database search engine (v.2.1, Matrix Science).

**Supplemental Table 5.** Effect of Polyprenol, Dolichol and Tunicamycin on Pollen Germination on Solid Medium, Related to Figure 6. Statistically significant differences are indicated: \* -  $P < 0.05$ ; \*\*\* -  $P < 0.001$ 

|               | Regular medium |                                       | Medium supplemented with |                                      |                |                                      |                        |                   |                   |
|---------------|----------------|---------------------------------------|--------------------------|--------------------------------------|----------------|--------------------------------------|------------------------|-------------------|-------------------|
|               |                |                                       | Prenol-16                |                                      | Dolichol - MIX |                                      | Tunicamucin, WT pollen |                   |                   |
|               |                |                                       |                          |                                      |                |                                      | 0 ng/ml<br>n=164       | 10 ng/ml<br>n=203 | 50 ng/ml<br>n=241 |
| Pollen grains | WT, n=1208     | <i>pprd2-1<sup>+/-</sup></i> , n=1424 | WT, n=482                | <i>pprd2-1<sup>+/-</sup></i> , n=438 | WT, n=522      | <i>pprd2-1<sup>+/-</sup></i> , n=508 |                        |                   |                   |
| normal        | 1160 (96%)     | 812 (57%)                             | 458 (95%)                | 228 (52%)                            | 506 (97%)      | 488 (96%)                            | 161 (98%)              | 171 (84%)         | 94 (39%)          |
| deformed      | 48 (4%)        | 612 (43%)***                          | 24 (5%)                  | 210 (48%)***                         | 16 (3%)        | 20 (4%)                              | 3 (2%)                 | 32 (16%)*         | 147 (61%)*        |

**Supplemental Table 6.** Phenotypes of Arabidopsis Mutants in Genes Encoding Elements of Isoprenoid Synthesis or Protein Glycosylation Pathways, Related to Discussion.

| Gene                              | Function                                                                                 | Phenotype                                                                                                                                                                                                                                                                                                                                                                                                                                                                                                                                                                                  | Reference                                        |
|-----------------------------------|------------------------------------------------------------------------------------------|--------------------------------------------------------------------------------------------------------------------------------------------------------------------------------------------------------------------------------------------------------------------------------------------------------------------------------------------------------------------------------------------------------------------------------------------------------------------------------------------------------------------------------------------------------------------------------------------|--------------------------------------------------|
| <b>MVA pathway encoding genes</b> |                                                                                          |                                                                                                                                                                                                                                                                                                                                                                                                                                                                                                                                                                                            |                                                  |
| <i>HMGS</i>                       | 3-hydroxy-3-methylglutaryl-CoA synthase                                                  | <i>fkp</i> (flaky pollen) null mutant is lethal due to male-sterility;<br><i>fkp1-4</i> pollen, carrying null allele of the gene, has normal 3 nuclei as visualized by DAPI stain, but does not germinate normally and is 100% sterile;<br>weak <i>fkp1-1</i> allele does not affect the vegetative growth, but pollen grains formed on heterozygote are infertile due to abnormal development of tapetum-specific organelles - elaioplasts and tapetosomes - leading to reduced pollen coat deposition and, as a consequence, adhesion and hydration on stigma                            | Ishiguro et al., 2010                            |
| <i>HMGR1</i><br><i>HMGR2</i>      | 3-hydroxy-3-methylglutaryl-CoA reductase responsible for formation of mevalonate         | <i>hmgr1 hmgr2</i> double mutant is lethal due to male-sterility;<br><i>hmgr1<sup>+/-</sup> hmgr2</i> heterozygous plants - half of pollen grains are malformed, shrunken and have underdeveloped ER structures, pollen lethality is due to both gametophytic and maternal sporophytic effects;<br><i>hmgr1</i> single mutant - plants are dwarfed and homozygotes are male sterile, short empty siliques are formed, male sterility comes from sporophytic, maternal defect of tapetum and can be reversed by external application of squalene, but not brassinosteroids on inflorescence | Suzuki et al., 2009<br><br>Suzuki et al., 2004   |
| <i>IDI1</i><br><i>IDI2</i>        | isopentenyl diphosphate isomerase responsible for formation of dimethylallyl diphosphate | <i>idi1 idi2</i> double mutant is lethal due to male-sterility                                                                                                                                                                                                                                                                                                                                                                                                                                                                                                                             | Phillips et al., 2008                            |
| <b>MEP pathway encoding genes</b> |                                                                                          |                                                                                                                                                                                                                                                                                                                                                                                                                                                                                                                                                                                            |                                                  |
| <i>DXS</i>                        | 1-deoxy-D-xylulose 5-phosphate synthase                                                  | <i>cla1</i> mutant is albino lethal; chloroplast biogenesis is affected                                                                                                                                                                                                                                                                                                                                                                                                                                                                                                                    | Mandel et al., 1996<br>Budziszewski et al., 2001 |
| <i>DXR</i>                        | 1-deoxy-D-xylulose 5-phosphate reducto-                                                  | <i>dxr</i> mutant is albino lethal; chloroplast biogenesis is affected                                                                                                                                                                                                                                                                                                                                                                                                                                                                                                                     | Budziszewski et al., 2001<br>Xing et al.,        |

|                                                          |                                                                                                                      |                                                                                                                                                                                                                                                                                                                                                                                                            |                                               |
|----------------------------------------------------------|----------------------------------------------------------------------------------------------------------------------|------------------------------------------------------------------------------------------------------------------------------------------------------------------------------------------------------------------------------------------------------------------------------------------------------------------------------------------------------------------------------------------------------------|-----------------------------------------------|
|                                                          | isomerase                                                                                                            |                                                                                                                                                                                                                                                                                                                                                                                                            | 2010                                          |
| <b>Isoprenoid chain formation</b>                        |                                                                                                                      |                                                                                                                                                                                                                                                                                                                                                                                                            |                                               |
| <i>FPPS1</i><br><i>FPPS2</i>                             | farnesyl diphosphate synthase responsible for synthesis of FPP                                                       | <i>fps1 fps2</i> double mutant is lethal due to block on embryo development at pre-globular stage, transmission through male gametophyte is severely reduced (12% of expected frequency), pollen grains develop 3 nuclei, pollen germination is not impaired, but growth of pollen tube is severely affected;<br><i>fps1</i> and <i>fps2</i> single mutants are viable and show minor biochemical defects; | Closa et al., 2010                            |
| <i>CPT1-9</i><br>2 out of 9 putative genes characterized | <i>cis</i> -prenyltransferase responsible for formation of polyprenyl diphosphate (syn. dehydrodolichyl diphosphate) | <i>cpt6</i> single mutant does not show phenotypic aberrations                                                                                                                                                                                                                                                                                                                                             | Surmacz et al., 2014                          |
| <i>LEW1</i>                                              | described as atypical AtCPT recently recognized as AtCPT-like accessory protein (ortholog of hNogoBR)                | <i>lew1</i> null mutant is lethal                                                                                                                                                                                                                                                                                                                                                                          | Zhang et al., 2008<br>Qu et al., 2015         |
| <i>PPRD1</i><br><i>PPRD2</i>                             | polyprenol reductase responsible for conversion of polyprenol to dolichol                                            | <i>pprd2</i> null mutation is lethal due to nonfunctional pollen, transmission through male gametophyte is abolished;<br><i>pprd2</i> point mutations - no defect observed;<br><i>pprd2</i> <sup>+/-</sup> heterozygous plant – sporophyte does not show phenotypic changes, approx. 50% pollen grains are wrinkled and pollen tubes are malformed                                                         | this report                                   |
| <i>DOK</i>                                               | dolichol kinase responsible for formation of dolichyl phosphate                                                      | <i>dok (evn)</i> null mutation is lethal, both mutated pollen and female gametophytes are nonfunctional;<br><i>dok</i> <sup>+/-</sup> heterozygous plant pollen is infertile, suggesting that intrinsic rather than maternal effect contributes to the lethality, mutated pollen grains wrinkled and hollow, some ovules have aberrant morphology and probably are unable to be fertilized                 | Kanehara et al., 2015<br>Lindner et al., 2015 |
| <b>Protein glycosylation pathway</b>                     |                                                                                                                      |                                                                                                                                                                                                                                                                                                                                                                                                            |                                               |
| <i>DPMS1</i>                                             | catalytic subunit of DoIPMan                                                                                         | <i>dpms1</i> mutant is viable, possesses wrinkled seed coat and is hypersensitive to                                                                                                                                                                                                                                                                                                                       | Jadid et al., 2011                            |

|                                                        |                                                                                                                                                                                          |                                                                                                                                                                                                                                                                                                                                                                        |                                                  |
|--------------------------------------------------------|------------------------------------------------------------------------------------------------------------------------------------------------------------------------------------------|------------------------------------------------------------------------------------------------------------------------------------------------------------------------------------------------------------------------------------------------------------------------------------------------------------------------------------------------------------------------|--------------------------------------------------|
|                                                        | synthase responsible for mannosylation of DoIP                                                                                                                                           | ammonium (chlorosis and strong reduction of root growth)                                                                                                                                                                                                                                                                                                               |                                                  |
| <i>ALG1</i>                                            | beta-1,4-mannosyltransferase responsible for transfer of mannose to DoIPP-GlcNAc <sub>2</sub>                                                                                            | <i>tun</i> null mutant is lethal due to defects in pollen tube reception.                                                                                                                                                                                                                                                                                              | Lindner et al., 2015                             |
| <i>LEW3</i>                                            | alfa-1,2-mannosyltransferase responsible for mannosylation of DoIPP-GlcNAc <sub>2</sub> Man <sub>3</sub>                                                                                 | <i>lew3</i> null mutant is lethal; <i>lew3</i> point mutant shows reduced fertility, short siliques, impaired cellulose synthesis, abnormal primary and secondary cell wall biosynthesis                                                                                                                                                                               | Zhang et al., 2009                               |
| <i>ALG10</i>                                           | alfa-1,2-glucosyltransferase responsible for the terminal glucosylation of DoIPP-GlcNAc <sub>2</sub> Man <sub>9</sub> Glc <sub>2</sub> precursor                                         | <i>alg10-1</i> mutant is viable, displays severe protein underglycosylation, reduced leaf size, reduced tolerance to salt stress                                                                                                                                                                                                                                       | Farid et al., 2011                               |
| multigene OST complex                                  | oligosaccharide transferase complex responsible for transfer of tetradecasaccharide structure from DoIP-GlcNAc <sub>2</sub> Man <sub>9</sub> Glc <sub>3</sub> to protein (Asn-X-Ser/Thr) | <i>dgl1-2</i> null mutant in one of OST complex subunits is embryo-lethal; <i>dgl1-1</i> point mutant shows developmental defects in early seedling development, including reduced cell elongation and collapse of cells of central cylinder due to changes in accumulation of callose; <i>stt3a stt3b</i> double mutant in OST complex subunit is gametophytic lethal | Lerouxel et al., 2005;<br><br>Koiwa et al., 2003 |
| <i>GCS1</i>                                            | glycan trimming after oligosaccharide transfer onto Asn in a protein molecule                                                                                                            | <i>gcs1</i> mutant is embryo-lethal (heart stage of development) and shows abnormal cell enlargement and occasional cell wall disruptions, abnormal accumulation of seed storage proteins, cytokinesis and cellulose biosynthesis                                                                                                                                      | Boisson et al., 2001                             |
| <i>N</i> - glycan processing of <i>N</i> -glycosylated | subsequent downstream steps of <i>N</i> -glycan                                                                                                                                          | homozygous null mutants show abnormalities in root growth, aberrant cellulose deposition pattern                                                                                                                                                                                                                                                                       | Liebmingier et al., 2009; Schaewen et al., 1993; |

|                              |                                                         |                                                                                                                                                                                                                                                                                 |                                                                                             |
|------------------------------|---------------------------------------------------------|---------------------------------------------------------------------------------------------------------------------------------------------------------------------------------------------------------------------------------------------------------------------------------|---------------------------------------------------------------------------------------------|
| proteins                     | processing                                              |                                                                                                                                                                                                                                                                                 | Strasser et al., 2004; Strasser et al., 2004b; Strasser et al., 2006; Strasser et al., 2007 |
| <i>SETH1</i><br><i>SETH2</i> | first step of GPI biosynthetic pathway                  | <i>seth1</i> and <i>seth2</i> mutations block male transmission and pollen function due to reduced pollen germination and tube growth, abnormal callose deposition                                                                                                              | Lalanne et al., 2004                                                                        |
| <i>APTG1</i>                 | mannosyltransferase involved in GPI-anchor biosynthesis | <i>aptg1</i> (abnormal pollen tube guidance) mutant pollen tubes shows compromised micropylar guidance, embryo lethality                                                                                                                                                        | Dai et al., 2014                                                                            |
| <i>PNT1</i>                  | mannosyltransferase involved in GPI-anchor biosynthesis | <i>pnt1</i> mutants are embryo-lethal, at early stages show large reduction in crystalline cellulose and an increase in pectin content, ectopic deposition of xyloglucan, pectin, and callose, poor transmission through pollen, with no significant effect on egg transmission | Gillmor et al., 2005                                                                        |

**Supplemental Table 7.** Primers Used for Genotyping, Cloning, Mutagenesis and Expression Studies, Related to Materials and Methods.

| Genotyping primers         |                                                                                                                                                                    |                                                                                            |
|----------------------------|--------------------------------------------------------------------------------------------------------------------------------------------------------------------|--------------------------------------------------------------------------------------------|
| Gene                       | Allele                                                                                                                                                             | Primer sequence                                                                            |
| <i>PPRD1</i>               | <i>PPRD1-OE</i>                                                                                                                                                    | gFP1 F: 5'-CATATTTATAGTGTGGGGTGGC-3'<br>gRP1 R: 5'-GAAAGAGAAAACGTGGGAACC-3'                |
| <i>PPRD2</i>               | <i>pprd2-1</i>                                                                                                                                                     | gFP2 F: 5'-GTCTGTGAATTTGCCCATCTG-3'<br>gRP2 R: 5'-TCCA CT CGCAATCAGTAAACC-3'               |
|                            | <i>pprd2-2</i>                                                                                                                                                     | gFP2 F: 5'-GTCTGTGAATTTGCCCATCTG-3'<br>gRP2 R: 5'-TCCA CT CGCAATCAGTAAACC-3'               |
| LBb1.3                     | -                                                                                                                                                                  | 5'-ATTTTGCCGATTTCCGGAAC-3'                                                                 |
| qPCR primers               |                                                                                                                                                                    |                                                                                            |
| Gene                       | Locus                                                                                                                                                              | Primer sequence                                                                            |
| <i>PPRD1</i>               | At1g72590                                                                                                                                                          | qFP1 F: 5'-GTGGCTGCTAATCTGACATAC-3'<br>qRP1 R: 5'-GTATAA ACTTGGCCAAAGTTGTG-3'              |
| <i>PPRD2</i>               | At2g16530                                                                                                                                                          | qFP2 F: 5'-GTGGCTGCTAATCTGACATAC-3'<br>qRP2 R: 5'-CAGCATTACAGAAGACAACCA-3'                 |
| <i>BiP2</i>                | At5g42020                                                                                                                                                          | F: 5'-GGTATCGAGACTGTAGGAGG-3'<br>R: 5'-GGTACGTTGTGAAAACCTGA-3'                             |
| <i>ACTIN-2</i>             | At3g18780                                                                                                                                                          | F: 5'-GACCAGCTCTTCCATCGAGAA-3'<br>R: 5'-CAAACGAGGGCTGGAACAAG-3'                            |
| Cloning primers            |                                                                                                                                                                    |                                                                                            |
| Gene                       | Tag type                                                                                                                                                           | Primer sequence                                                                            |
| <i>PPRD1</i>               | No tag                                                                                                                                                             | F: 5'-CACCATGGAGGTAGAGATTGTGTGG-3'<br>R: 5'-TTAGTAGACATGAGGGAAAATAGCATGC-3'                |
|                            | GST                                                                                                                                                                | F: 5'-CACCATGGAGGTAGAGATTGTGTGG-3'<br>R: 5'-GTAGACATGAGGGAAAATAGCATGC-3'                   |
| <i>PPRD2</i>               | No tag                                                                                                                                                             | F: 5'-CACCATGGTGG AATTGGAGATTGTG-3'<br>R: 5'-TTAGTAGACATAAGGGAAAATGGCATGC-3'               |
|                            | GST                                                                                                                                                                | F: 5'-CACCATGGTGG AATTGGAGATTGTG-3'<br>R: 5'-GTAGACATAAGGGAAAATGGCATGCC-3'                 |
| <i>PPRD1<sub>Pro</sub></i> | nd                                                                                                                                                                 | F: 5'-CACCTTCTTATATAAAAATAAGGTAAAGGAAGAATAT-3'<br>R: 5'-CTCCATACTTTTTTTTTTTTGTGTGTGTGTG-3' |
| <i>PPRD2<sub>Pro</sub></i> | nd                                                                                                                                                                 | F: 5'-CACCAAGGCATAACTTAATAACAAGCTCCACTA-3'<br>R: 5'-ACTTTTTTGT TTAGTGT TTTCTTCTCTGAAATC-3' |
| Mutagenesis primers        |                                                                                                                                                                    |                                                                                            |
| Construct                  | Primer sequence                                                                                                                                                    |                                                                                            |
| <i>PPRD2 H321L</i>         | F: 5'-CACCATGGTGG AATTGGAGATTGTG-3'<br>R: 5'-CGTTTCTCCAGCCGCGTATGTCAGATTAGC-3'<br>F: 5'-TCTGACATACGCGGCTGGAGAAACGCTCCG-3'<br>R: 5'-TTAGTAGACATAAGGGAAAATGGCATGC-3' |                                                                                            |
| <i>PPRD2 H336L</i>         | F: 5'-CACCATGGTGG AATTGGAGATTGTG-3'<br>R: 5'-TTAGTAGACATAAGGGAAAATGGCAAGCC-3'                                                                                      |                                                                                            |
